# Supplementary material for: FeNC catalysts for CO2 electroreduction to CO: effect of nanostructured carbon supports
Source: Royal Society of Chemistry journal article supplement (doi:10.1039/c9se00214f), 2019-01-01
Supplement: c9se00214f1.pdf [file c9se00214f1.pdf]

## Supporting Information

### **FeNC Catalysts for CO<sub>2</sub> Electroreduction to CO: Effect of Nanostructured Carbon Supports**

*Dilan Karapinar<sup>1</sup>, Ngoc Tran Huan<sup>1</sup>, Domitille Giaume<sup>2</sup>, Nastaran Ranjbar<sup>3</sup>, Frédéric Jaouen<sup>3</sup>, Victor Mougel<sup>1\*</sup>, Marc Fontecave<sup>1\*</sup>*

<sup>1</sup>Laboratoire de Chimie des Processus Biologiques, UMR CNRS 8229, Collège de France-CNRS-Sorbonne Université, 11 Place Marcelin Berthelot, 75005 Paris, France.

<sup>2</sup>Chimie Paris Tech, PSL Research University, CNRS, Institut de Recherche de Chimie de Paris, 11 rue Pierre et Marie Curie, 75005 Paris, France

<sup>3</sup>Institut Charles Gerhardt Montpellier, UMR CNRS 5253, Université Montpellier, 2 place Eugène Bataillon 34095 Montpellier, France

KEYWORDS. CO<sub>2</sub> reduction – electrocatalysis – iron - Fe-N-C materials-carbon supports.

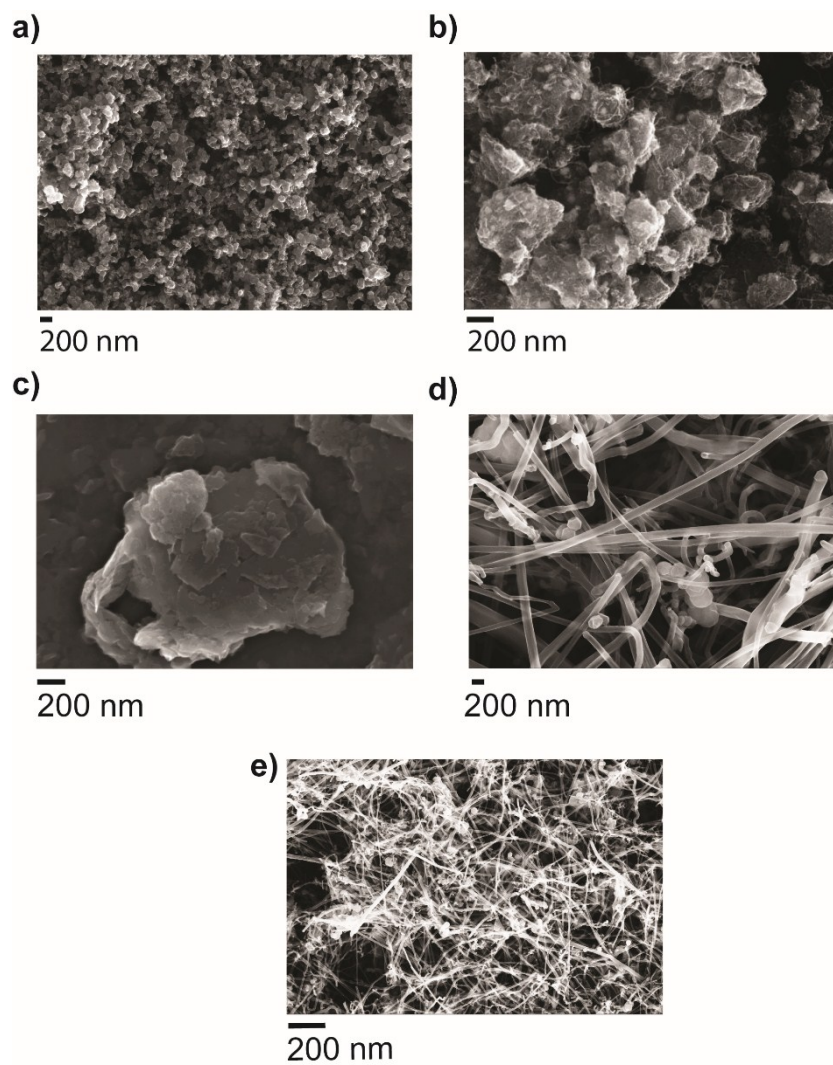

**Figure S1.** SEM images of (a) bare GDL and (b) FeNC, (c) rGO, (d) CNF and (e) CNT deposited on GDL

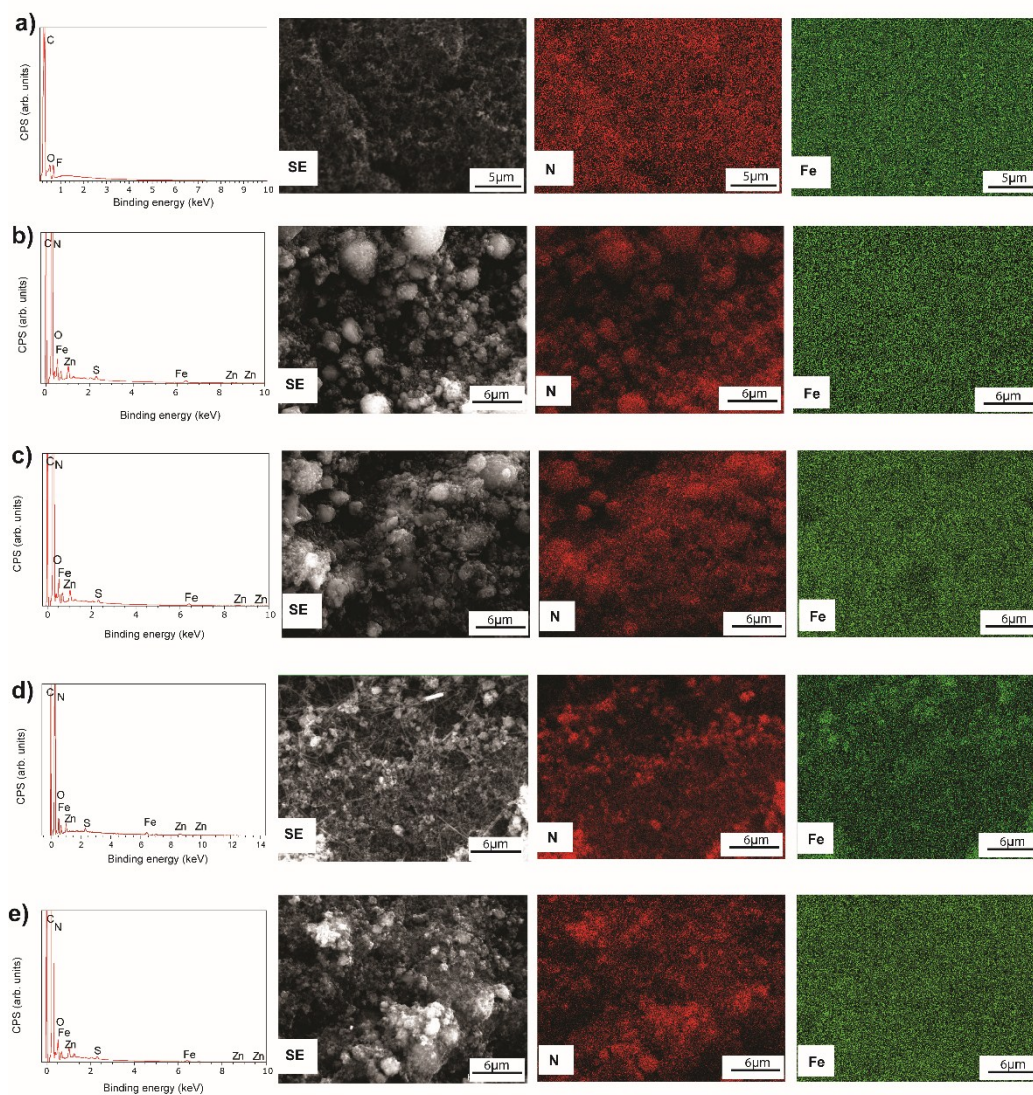

**Figure S2.** SEM-EDS analysis of (a) bare GDL and (b) FeNC (c) FeNC-rGO (d) FeNC-CNF (e) FeNC-CNT. Fe in green and N in red.

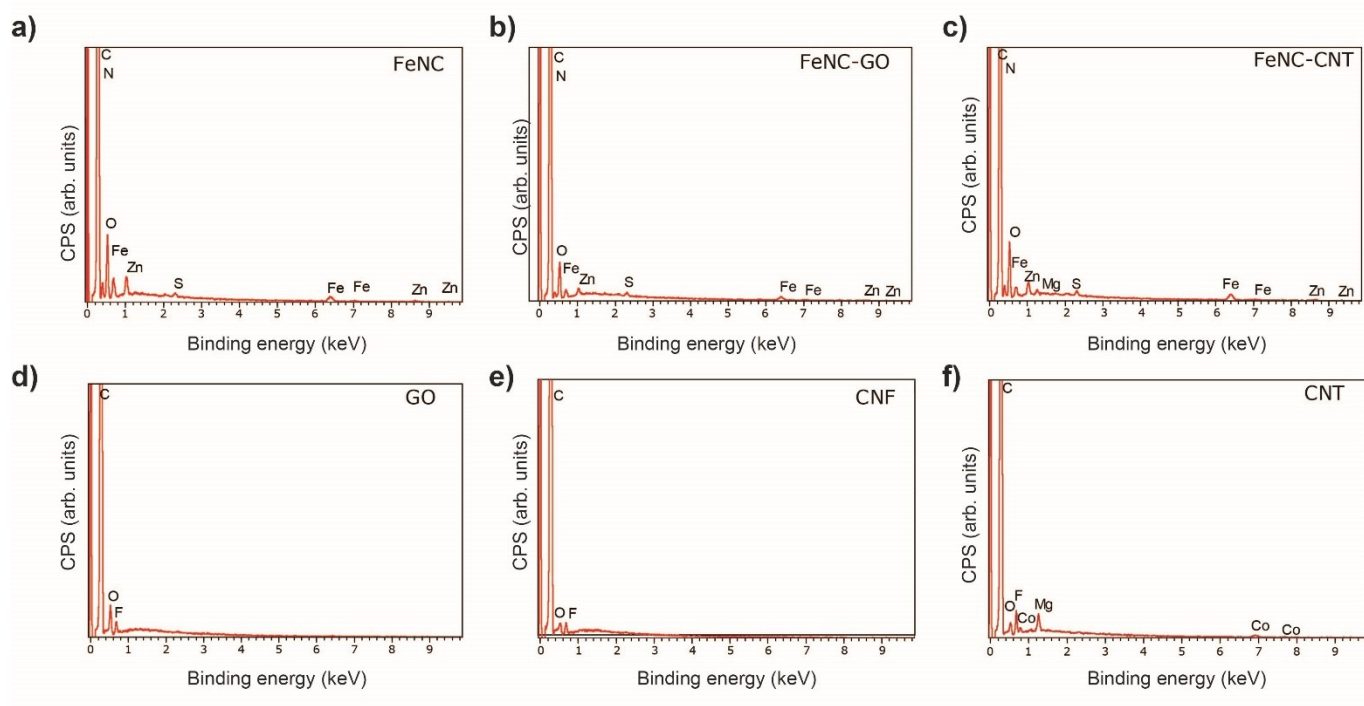

**Figure S3.** EDS analysis of **(a)** FeNC , **(b)** FeNC-GO, **(c)** FeNC-CNT, **(d)** GO, **(e)** CNF and **(f)** CNT.

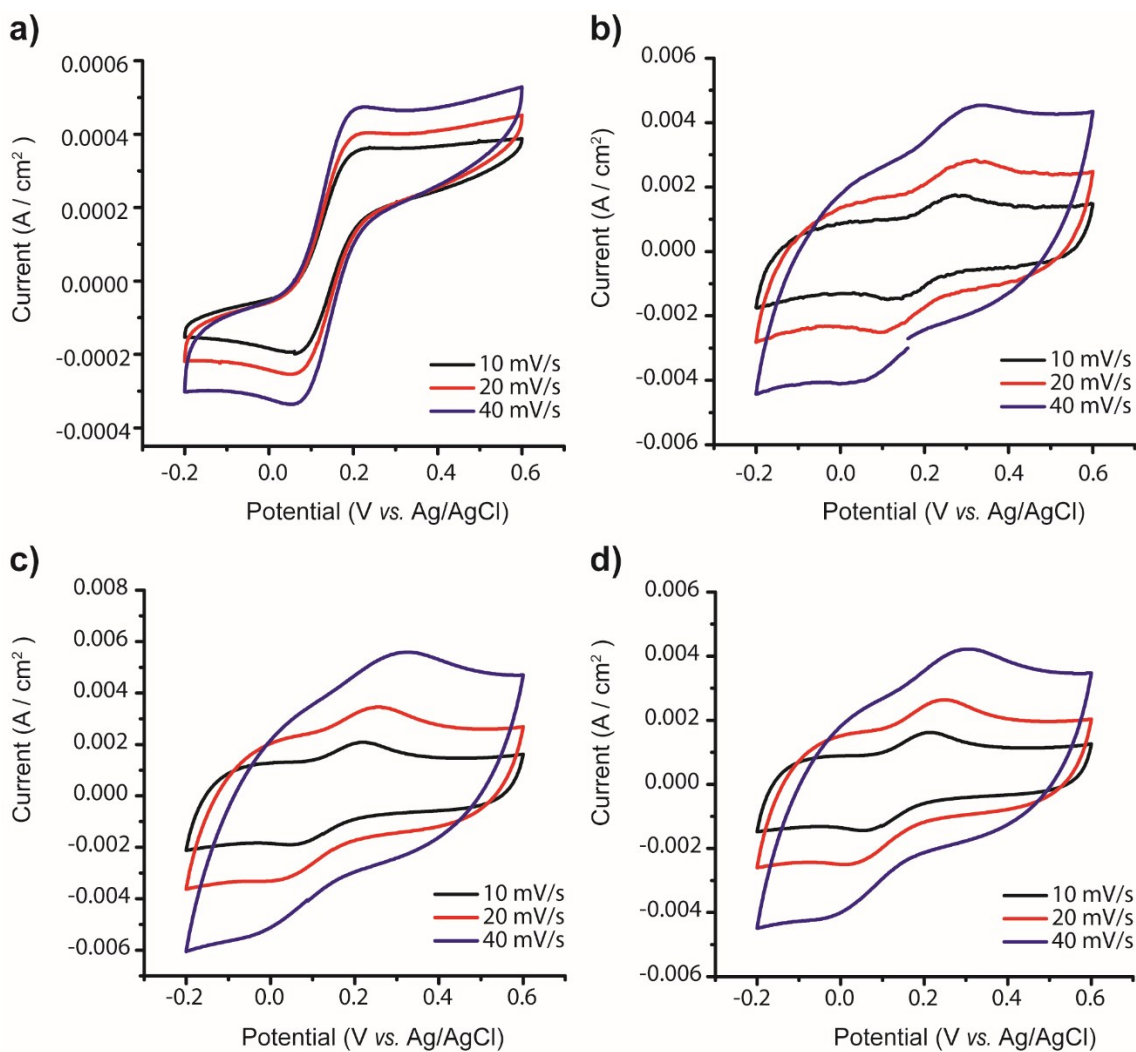

**Figure S4.** Cyclic voltammograms (CV) of (a) FeNC, (b) FeNC-rGO, (c) FeNC-CNF and (d) FeNC-CNT electrodes under conditions of 10 mM ferrocyanide in 0.1 M KCl at various scan rates. Cathodic and anodic peak currents correspond to the redox activity of ferrocyanide.

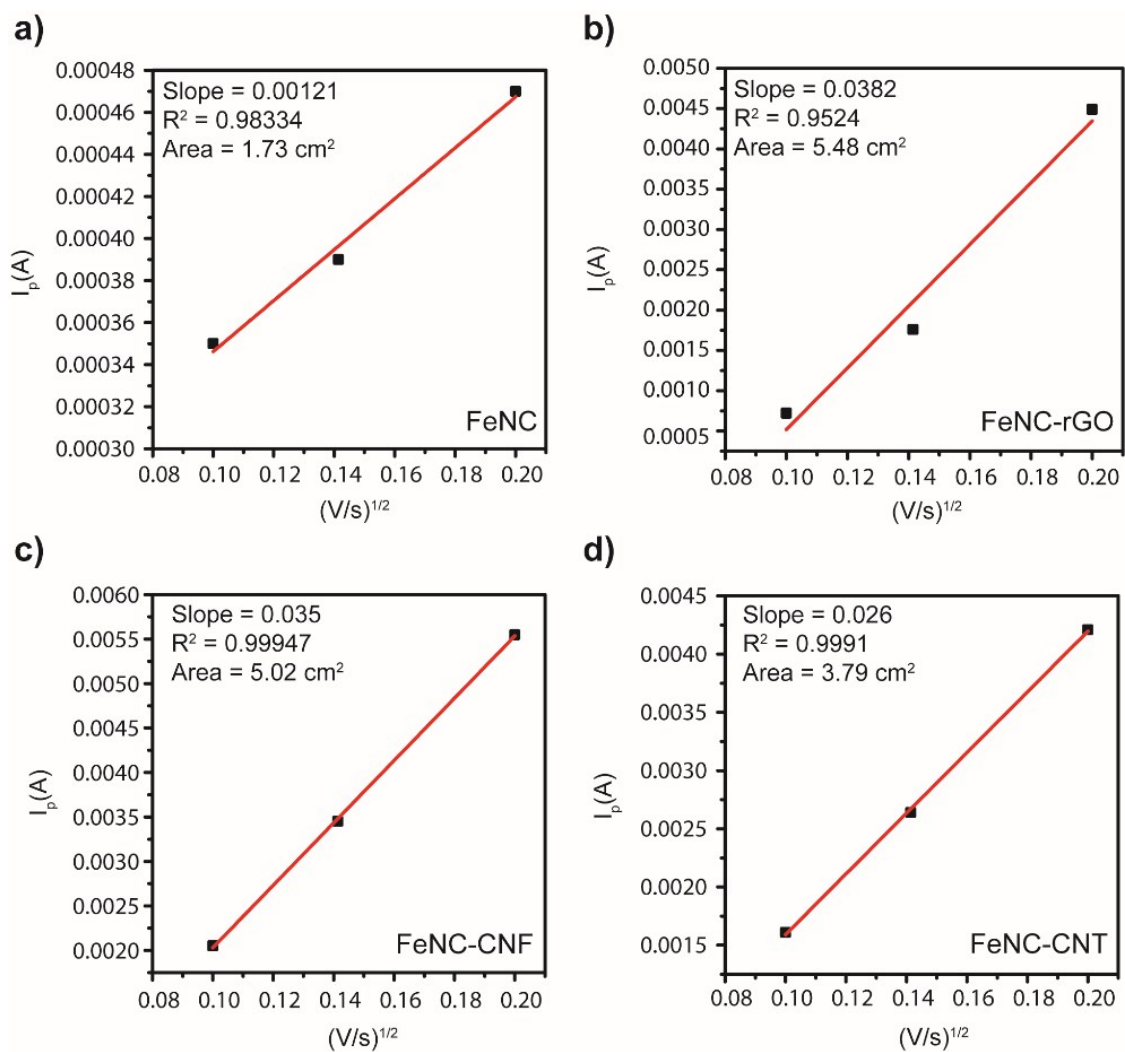

**Figure S5.** Peak current as a function of the square root of scan rate. Data are derived from the CVs shown in Figure S4, for (a) FeNC, (b) FeNC-rGO, (c) FeNC-CNF and (d) FeNC-CNT. The ECSAs are estimated from the slope of the plots.

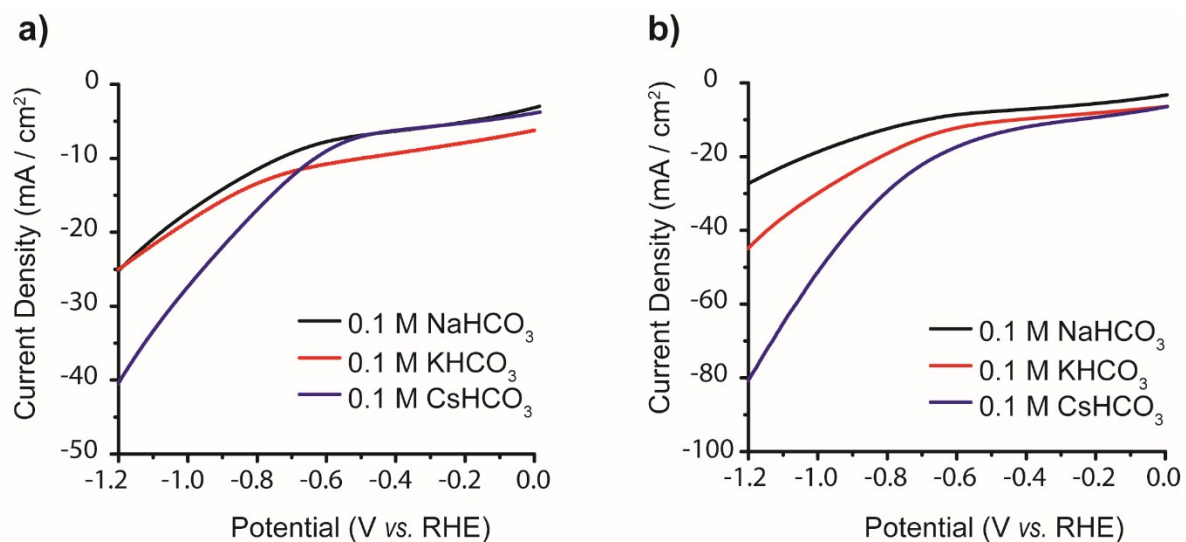

**Figure S6.** LSVs of (a) FeNC-CNF and (b) FeNC-CNT electrodes in CO<sub>2</sub>-saturated aqueous solutions of various alkali bicarbonates. Scan rate: 10 mV/s.

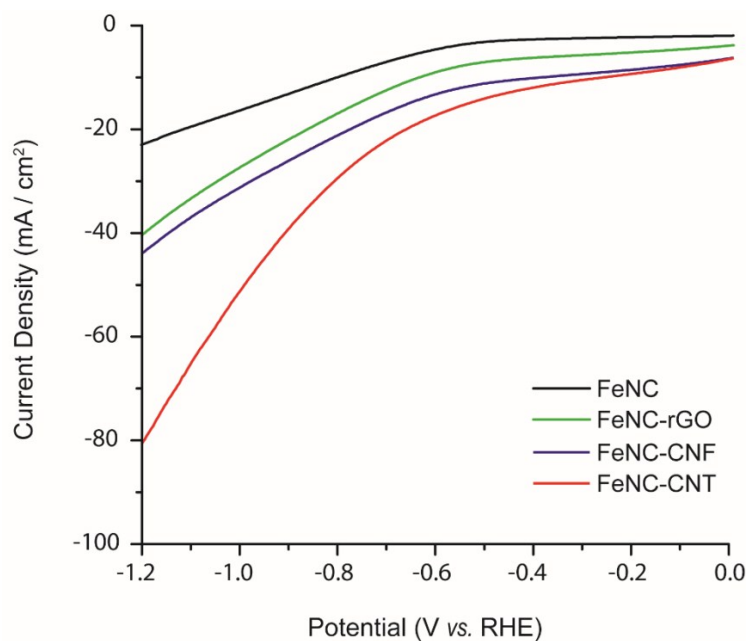

**Figure S7.** LSVs of FeNC (black), FeNC-rGO (green), FeNC-CNF (blue), and FeNC-CNT (red) electrodes in CO<sub>2</sub>-saturated 0.1M CsHCO<sub>3</sub> aqueous solutions. Scan rate: 10 mV/s.

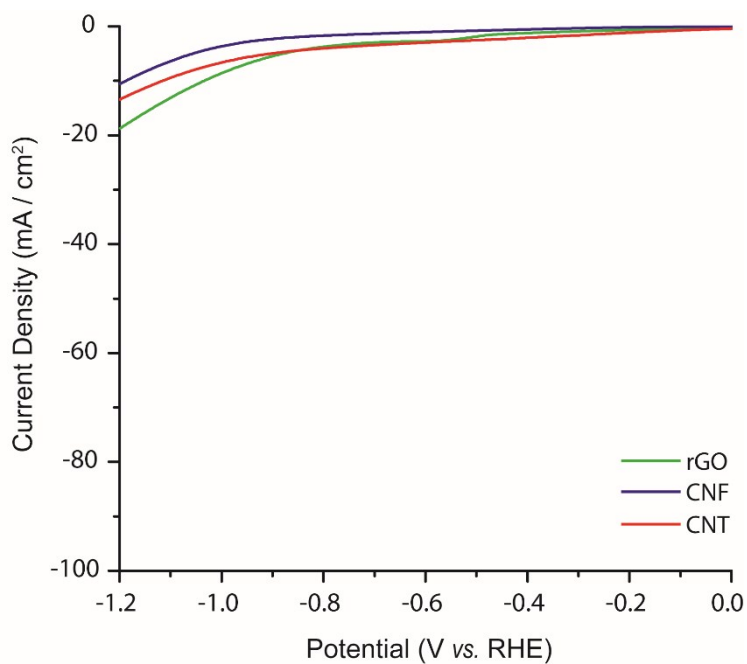

**Figure S8.** LSVs of rGO (green), CNF (blue) and CNT (red) electrodes in CO<sub>2</sub>-saturated 0.1M CsHCO<sub>3</sub> aqueous solutions. Scan rate: 10 mV/s.

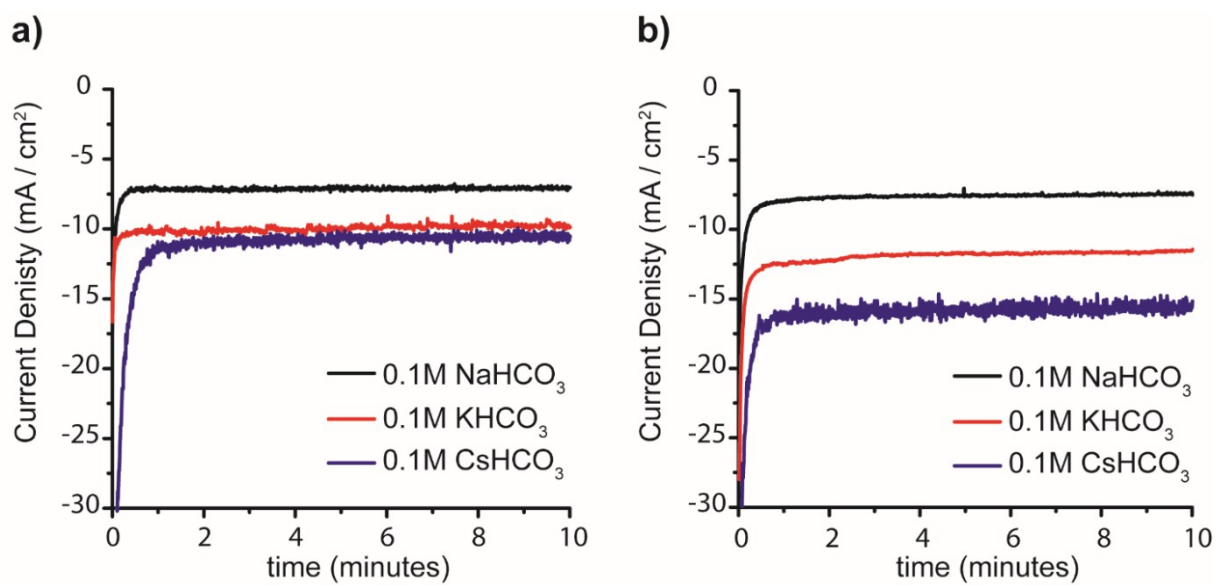

**Figure S9.** Current density variations during CPE at -0.7 V vs. RHE using (a) FeNC-CNF and (b) FeNC-CNT electrodes in aqueous solutions of various alkali bicarbonates. CO<sub>2</sub> flow: 10 mL/min



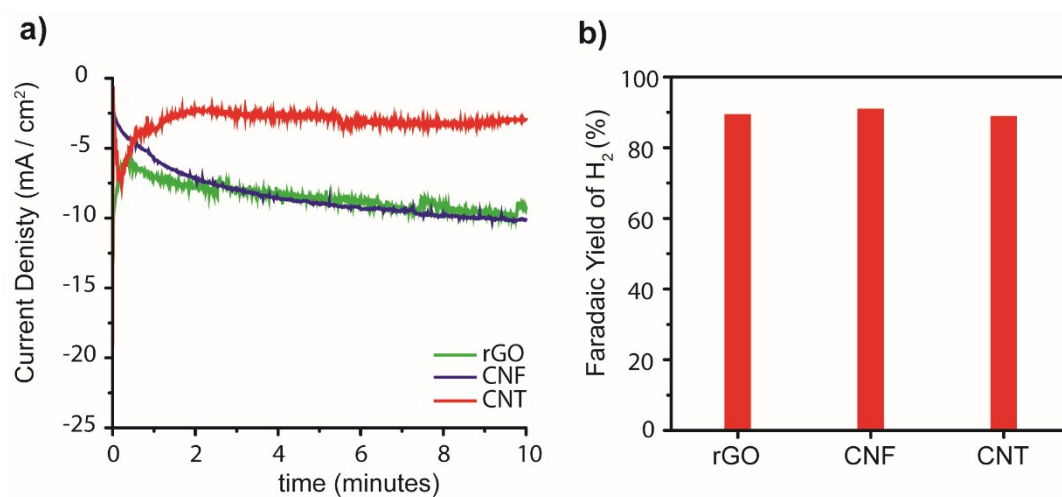

**Figure S10.** (a) Current density variation during CPE at -0.7 V vs. RHE using rGO (green), CNF (blue), and CNT (red) electrodes and (b) Faradaic Yields for H<sub>2</sub>. CPE conditions: 10 mL/min flow of CO<sub>2</sub> in a 0.1 M CsHCO<sub>3</sub> aqueous solution.

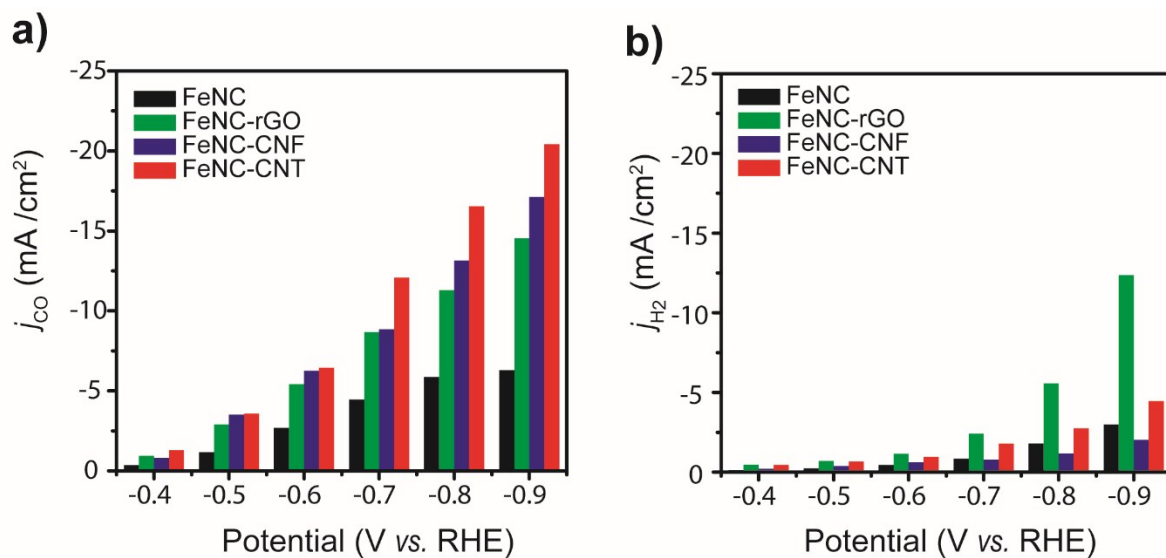

**Figure S11.** Partial current densities for (a) CO and (b) H<sub>2</sub> production after 10 min CPE at various applied potentials. CPE conditions: 10 mL/min flow of CO<sub>2</sub> in a 0.1 M CsHCO<sub>3</sub> aqueous solution.

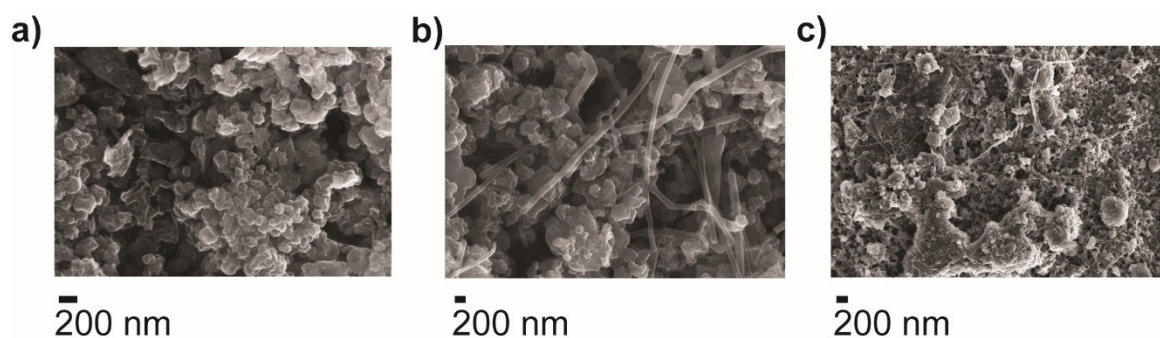

**Figure S12.** SEM images of (a) FeNC-rGO, (b) FeNC-CNF and (c) FeNC-CNT deposited on GDL, after 10 min CPE at various applied potentials. The materials have been characterized after the series of electrolysis reported in Figure S11. CPE conditions: 10 mL/min flow of CO<sub>2</sub> in a 0.1 M CsHCO<sub>3</sub>

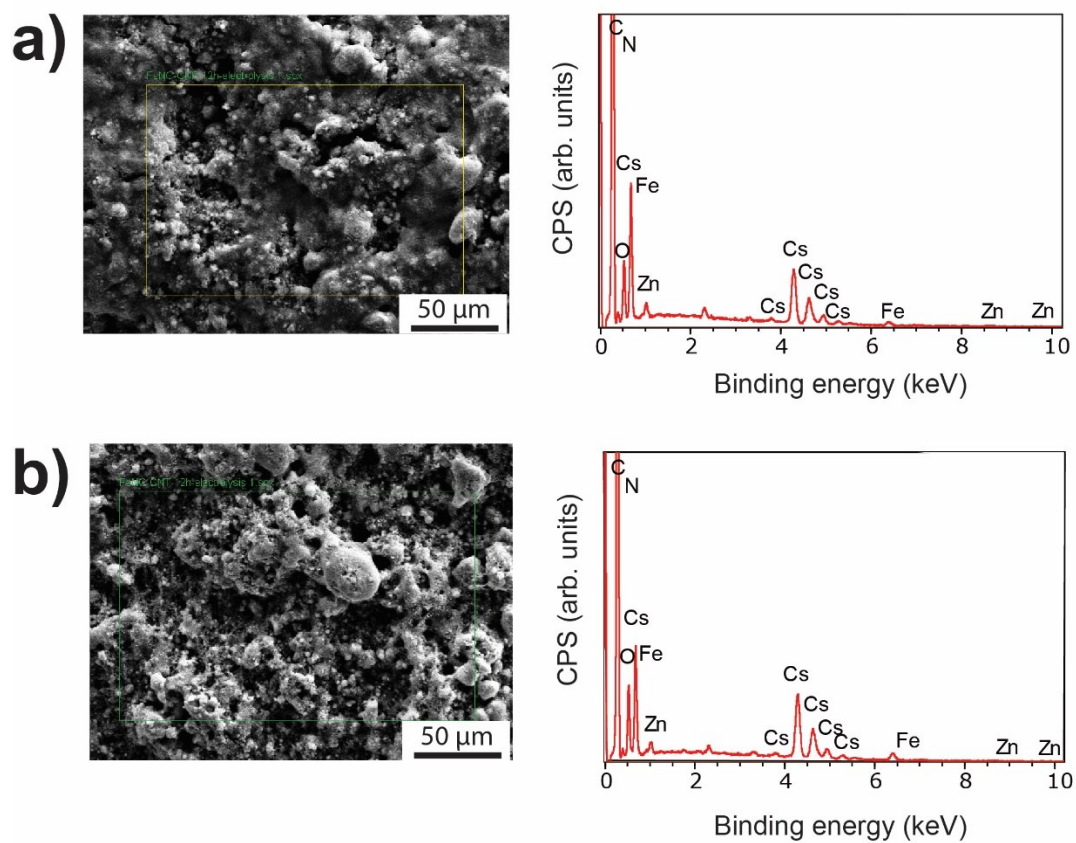

**Figure S13.** EDS analysis of **(a)** FeNC-CNF **(b)** FeNC-CNT deposited on GDL, after 12 hours CPE at -0.7 V vs RHE. CPE conditions: 10 mL/min flow of CO<sub>2</sub> in a 0.1 M CsHCO<sub>3</sub>.

**Table S1.** Fe contents within the various electrodes determined using ICP-AES analysis of solutions prepared by hot-plate digestion of electrode materials in 5 ml of the H<sub>2</sub>SO<sub>4</sub>-HNO<sub>3</sub> (3:1) mixture and diluted 4 times with HNO<sub>3</sub>. Fe amounts are expressed in ppm within the final solution.

|                   | <i>Wavelength<br/>h (nm)</i> | <i>Standard<br/>Deviation</i> | <i>Mass<br/>concentration<br/>of Fe (ppm)</i> | <i>Amount of Fe<br/>per 1 cm<sup>2</sup> (mg)</i> |
|-------------------|------------------------------|-------------------------------|-----------------------------------------------|---------------------------------------------------|
| <b>FeNC alone</b> | 259.94                       | 0.124                         | 11.804                                        | 0.053                                             |
| <b>FeNC-rGO</b>   | 259.94                       | 0.056                         | 12.68                                         | 0.063                                             |
| <b>FeNC-CNF</b>   | 259.94                       | 0.108                         | 16.988                                        | 0.084                                             |
| <b>FeNC-CNT</b>   | 259.94                       | 0.168                         | 11.764                                        | 0.058                                             |

**Table S2.** The Tafel parameters are the intercept, a, which is actually  $\log(i_0)$ , and the slope, b. Tafel parameters were determined by fitting the linear portion of the plot and the goodness of fit of the data to the model was evaluated by using the regression coefficient (R<sup>2</sup>).

|                   | <i>Tafel Slope for CO<br/>(mV)</i> | <i>Onset Potential for<br/>CO (mV)</i> | <i>Regression<br/>coefficient (R<sup>2</sup>)</i> |
|-------------------|------------------------------------|----------------------------------------|---------------------------------------------------|
| <b>FeNC alone</b> | 231                                | 404                                    | 0.97526                                           |
| <b>FeNC-rGO</b>   | 244                                | 314                                    | 0.93551                                           |
| <b>FeNC-CNF</b>   | 198                                | 323                                    | 0.87841                                           |
| <b>FeNC-CNT</b>   | 262                                | 282                                    | 0.94627                                           |
